# Supplementary material
Source: ML conference proceedings conference paper supplement (https://proceedings.neurips.cc/paper_files/paper/2019/hash/9bdb8b1faffa4b3d41779bb495d79fb9-Abstract.html)
Supplement: Supplementary file [file 9bdb8b1faffa4b3d41779bb495d79fb9-Supplemental.zip]

---

## **(Appendix) BIVA: A Very Deep Hierarchy of Latent Variables for Generative Modeling**

---

**Lars Maaløe**  
Corti  
Copenhagen  
Denmark  
lm@corti.ai

**Marco Fraccaro**  
Unumed  
Copenhagen  
Denmark  
mf@unumed.com

**Valentin Liévin & Ole Winther**  
Technical University of Denmark  
Copenhagen  
Denmark  
{valv,olwi}@dtu.dk

## A Deep Learning and Variational Inference

The introduction of stochastic backpropagation [36, 18] and the variational auto-encoder (VAE) [24, 40] has made approximate Bayesian inference and probabilistic latent variable models applicable to machine learning problems considering complex data distributions, e.g. natural images, audio, and text. The VAE is a generative model parameterized by a neural network  $\theta$  and is defined by an observed variable  $x$  that depends on a hierarchy of stochastic latent variables  $\mathbf{z} = z_1, \dots, z_L$  so that:  $p_\theta(x, \mathbf{z}) = p_\theta(x|z_1)p_\theta(z_L)\prod_{i=1}^{L-1}p_\theta(z_i|z_{i+1})$ . This is illustrated in Figure 5a.

The distributions  $p_\theta(z_i|z_{i+1})$  over the latent variables of the VAE are normally defined as Gaussians with diagonal covariance, whose parameters depend on the previous latent variable in the hierarchy (with the top latent variable  $p_\theta(z_L) = \mathcal{N}(z_L; 0, I)$ ). The likelihood  $p_\theta(x|z_1)$  is typically a Gaussian distribution for continuous data, or a Bernoulli distribution for binary data.

In order to learn the parameters  $\theta$  we seek to maximize the log marginal likelihood over a training set:  $\sum_i \log p_\theta(x_i) = \sum_i \log \int p_\theta(x_i, \mathbf{z}_i) d\mathbf{z}_i$ . However, complex data distributions require an expressive model, which makes the above integral intractable. In order to circumvent this, we use Variational Inference [19] and introduce a posterior approximation  $q_\phi(\mathbf{z}|x)$ , known as *inference network* or *encoder*, that is parameterized by a neural network  $\phi$ . Using Jensen’s inequality we can derive the *evidence lower bound* (ELBO), a lower bound to the integral in the marginal likelihood which is a function of the variational approximation  $q_\phi(\mathbf{z}|x)$  and the generative model  $p_\theta(x, \mathbf{z})$ :

$$\log p_\theta(x) \geq \mathbb{E}_{q_\phi(\mathbf{z}|x)} \left[ \log \frac{p_\theta(x, \mathbf{z})}{q_\phi(\mathbf{z}|x)} \right] \equiv \mathcal{L}(\theta, \phi). \quad (3)$$

The parameters  $\theta$  and  $\phi$  can be optimized by maximizing the ELBO with stochastic backpropagation and the reparameterization trick, which allows using gradient ascent algorithms with low variance gradient estimators [24, 40]. As illustrated in Figure 5b in a VAE the variational approximation is factorized with a bottom-up structure,  $q_\phi(\mathbf{z}|x) = q_\phi(z_1|x) \prod_{i=1}^{L-1} q_\phi(z_{i+1}|z_i)$ , so that each latent variable is conditioned on the variable below in the hierarchy. For ease of computation, all the factors in the variational approximation are typically assumed to be Gaussians whose mean and diagonal covariance are parameterized by neural networks.

**Latent variable collapse in VAEs.** A deep hierarchy of latent stochastic variables will result in a more expressive model. However, the additional variables come at a price. As shown in [5, 30], we can rewrite the ELBO (eq. (1)):

$$\mathcal{L}(\theta, \phi) = \mathbb{E}_{q_\phi(\mathbf{z}|x)} \left[ \log \frac{p_\theta(x, z_{<L}|z_L)}{q_\phi(z_{<L}|x)} \right] - \mathbb{E}_{q_\phi(z_{<L}|x)} [KL[q_\phi(z_L|z_{<L})||p_\theta(z_L)]] .$$

From the above, it becomes obvious that, during the optimization of the VAE, the top stochastic latent variables may have a tendency to *collapse* into the prior, i.e.  $q_\phi(z_L|z_{<L}) = p_\theta(z_L) = \mathcal{N}(z_L; 0, I)$ , if the model  $p_\theta(x, z_{<L}|z_L)$  is powerful enough. This is supported by empirical results in [50, 2] amongst others. The tendency has limited the applicability of deep VAEs in problems with complex data distributions, and has pushed VAE research towards the extension of shallow VAEs with autoregressive models, that allow capturing a *lossy* representation in the latent space while achieving strong generative performances [14, 5]. Another research direction has focused on learning more complex prior distributions through normalizing flows [39, 52, 23]. Our research considers instead the original goal of building expressive models that can exploit a deeper hierarchy of stochastic latent variables while avoiding variable collapse.

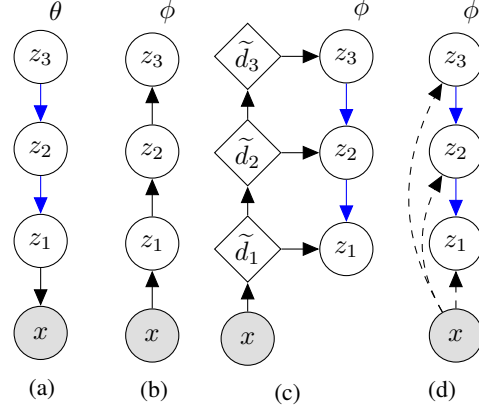

Figure 5: (a) Generative model of a VAE/LVAE with  $L = 3$  stochastic variables, (b) VAE inference model, (c) LVAE inference model, and (d) skip connections among stochastic variables in the LVAE where dashed lines denote a skip-connection. Blue arrows indicate that there are shared parameters between the inference and generative model.

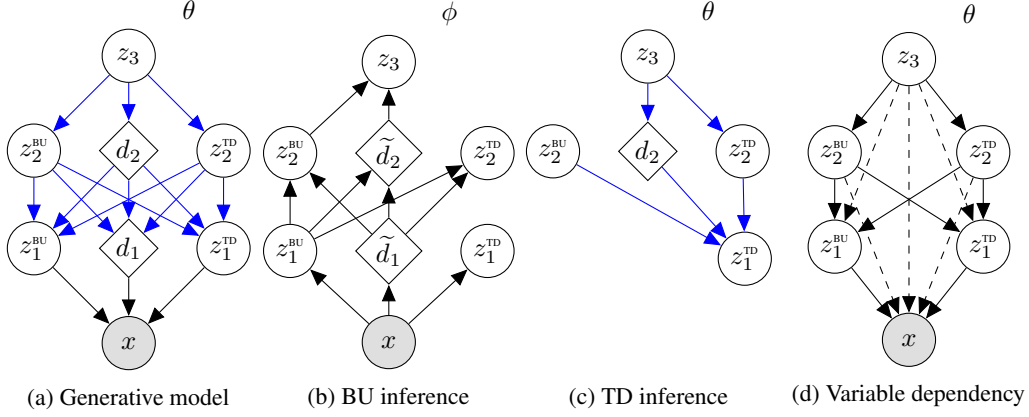

Figure 6: A  $L = 3$  layered BIVA with (a) the generative model, (b) bottom-up (BU) inference path, (c) top-down (TD) inference path, and (d) variable dependency of the generative models where dashed lines denote a skip-connection. Blue arrows indicate that the deterministic parameters are shared within the generative model or between the generative and inference model.

## B Detailed Model Description

**Generative model.** The generative model (see Figure 6a) has a top-down path going from  $z_L$  through the intermediary stochastic latent variables to  $x$ . Between each stochastic layer there is a ResNet block with  $M$  layers set up similarly to [45]. Weight normalization [46] is applied in all neural network layers. In the generative model, the BU and TD units are not distinguished so we write  $z_i = (z_i^{\text{BU}}, z_i^{\text{TD}})$ . We use  $f_{i,j}$  to denote the neural network function (a function of generative model parameters  $\theta$ ) of ResNet layer  $j$  associated with stochastic layer  $i$ . The feature maps are written as  $d_{i,j}$ . The generative process can then be iterated as  $z_L \sim \mathcal{N}(0, I)$  and  $i = L - 1, L - 2, \dots, 1$ :

$$d_{i,0} = z_{i+1} \quad (4)$$

$$d_{i,j} = \langle f_{\theta_{i,j}}(d_{i,j-1}); d_{i+1,j} \rangle \text{ for } j = 1, \dots, M \quad (5)$$

$$z_i = \mu_{\theta,i}(d_{i,M}) + \sigma_{\theta,i}(d_{i,M}) \otimes \epsilon_i, \quad (6)$$

where  $d_{L,j} = 0$ ,  $\langle \cdot \rangle$  denotes concatenation of feature maps in the convolutional network and hidden units in the fully connected network,  $\epsilon \sim \mathcal{N}(0, I)$  and  $\mu(\cdot)$  and  $\sigma(\cdot)$  are parameterized by neural networks. To complete the generative model  $p(x|\mathbf{z})$  is written in terms of  $z_1$  and  $d_1$  through a ResNet block  $f_0$ .

**Inference model.** The inference model (see Figure 6b and 6c) consists of a bottom-up (BU) and top-down (TD) paths such that bottom-up stochastic units only receive bottom-up information whereas the top-down units receive both bottom-up and top-down information. The top-down path shares parameters with the generative model. For each stochastic latent variable  $z_i$  in  $i = 1, \dots, L$  we use a ResNet block with  $M$  layers and there are associated neural network functions  $g_{i,j}$ ,  $j = 1, \dots, M$  with parameters collectively denoted by  $\phi$ . The deterministic feature map of layer  $i, j$  is denoted by  $\tilde{d}_{i,j}$ :

$$\tilde{d}_{i,0} = \begin{cases} x & i = 1 \\ \langle z_{i-1}; \tilde{d}_{i-1,M} \rangle & \text{otherwise} \end{cases} \quad (7)$$

$$\tilde{d}_{i,j} = \langle g_{i,j}(\tilde{d}_{i,j-1}); \tilde{d}_{i-1,j} \rangle \text{ for } j = 1, \dots, M, \quad (8)$$

$$z_i^{\text{BU}} = \mu_i^{\text{BU}}(\tilde{d}_{i,M}) + \sigma_i^{\text{BU}}(\tilde{d}_{i,M}) \otimes \epsilon_i^{\text{BU}} \quad (9)$$

where  $\epsilon \sim \mathcal{N}(0, I)$ . Finally, to infer the top-down latent we use the bottom-up latent  $z_i^{\text{BU}}$  inferred in eq. (9) and pass them through the generative path eq. (5) for  $i = L - 1, L - 2, \dots, 2$  to determine  $d_{i,M}$  and

$$z_i^{\text{TD}} = \mu_i^{\text{TD}}(\langle \tilde{d}_{i,M}; d_{i,M} \rangle) + \sigma_i^{\text{TD}}(\langle \tilde{d}_{i,M}; d_{i,M} \rangle) \otimes \epsilon_i^{\text{TD}}. \quad (10)$$

## C Experimental Setup

Throughout all experiments, we follow the BIVA model description that is described in detail in Appendix B and F

**Optimization.** All models are optimized using Adamax [20] with a hyperparameter setting similar to the one used in [23]. They are trained with a batch-size of 48 where the binary image experiments are trained on a single GPU and the natural image experiments are trained on two GPUs (by splitting the batch in 2 and then taking the mean over the gradients). For evaluation, we use exponential moving averages of the parameters space, similar to [23, 45].

**Binary image architecture.** BIVA has  $L = 6$  layers. The  $g_{\phi_1}$  neural networks are defined by  $M = 3$ , 64x5x5 (number of kernels x kernel width x kernel height) convolutional layers and an overall stride of 2. Neural networks  $i = 2, \dots, 6$  are defined by four  $M = 3$ , 64x3x3 convolutional layers. The final neural network,  $i = 6$ , applies a stride of 2. All stochastic latent variables are densely connected layers of dimension 48, 40, 32, 24, 16, 8 for  $1, \dots, L$  respectively. We apply a dropout rate of 0.5 for both the deterministic layers in the generative as well as the inference model.

**Natural image architecture (32x32).** BIVA has  $L = 15$  layers. The  $g_{\phi_1}$  neural networks are defined by  $M = 3$ , 96x5x5 convolutional layers and an overall stride of 2. Neural networks  $i = 2, \dots, 15$  are defined by  $M = 3$ , 96x3x3 convolutional layers. Neural networks 11 and 15 are defined with a stride of 2. All stochastic latent variables are parameterized by convolutional layers with 38, 36, 34, ..., 10 feature maps for  $1, 2, 3, \dots, L$  respectively. The kernel width and height of the stochastic latent variables are defined similarly to the dimension of the subsequent output after striding. We apply a dropout rate of 0.2 in the deterministic layers of the inference model.

**Natural image architecture (64x64).** BIVA has  $L = 20$  layers. The  $g_{\phi_1}$  and  $g_{\phi_2}$  neural networks are defined by  $M = 3$ , 64x7x7 and 64x5x5 convolutional layers respectively with a stride of 2 in each. Neural networks  $i = 3, \dots, 11$  are defined by  $M = 3$  64x3x3 convolutional layers. Neural network 11 is defined with a stride of 2. Neural networks  $i = 12, \dots, 20$  are defined by  $M = 3$ , 128x3x3 convolutional layers and network 20 has a stride of 2. All stochastic latent variables are parameterized by convolutional layers with 20, 19, 18, ..., 1 feature maps for  $1, 2, 3, \dots, L$  respectively. The kernel width and height of the stochastic latent variables are defined similarly to the dimension of the subsequent output after striding. We apply a dropout rate of 0.2 in the deterministic layers of the inference model.

## D Modeling Complex 2D Densities

$$\begin{array}{l}
 \text{POTENTIAL } U(\mathbf{Z}) \\
 \hline
 \mathbf{1:} \quad \frac{1}{2} \left( \frac{\|\mathbf{z}\|^2 - 2}{0.4} \right)^2 - \ln \left( e^{-\frac{1}{2} \left[ \frac{\mathbf{z}_1 - 2}{0.6} \right]^2} + e^{-\frac{1}{2} \left[ \frac{\mathbf{z}_1 + 2}{0.6} \right]^2} \right) \\
 \mathbf{2:} \quad \frac{1}{2} \left[ \frac{\mathbf{z}_2 - w_1(\mathbf{z})}{0.4} \right]^2 \\
 \mathbf{3:} \quad -\ln \left( e^{-\frac{1}{2} \left[ \frac{\mathbf{z}_2 - w_1(\mathbf{z})}{0.35} \right]^2} + e^{-\frac{1}{2} \left[ \frac{\mathbf{z}_2 - w_1(\mathbf{z}) + w_2(\mathbf{z})}{0.35} \right]^2} \right) \\
 \mathbf{4:} \quad -\ln \left( e^{-\frac{1}{2} \left[ \frac{\mathbf{z}_2 - w_1(\mathbf{z})}{0.4} \right]^2} + e^{-\frac{1}{2} \left[ \frac{\mathbf{z}_2 - w_1(\mathbf{z}) + w_3(\mathbf{z})}{0.35} \right]^2} \right) \\
 \hline
 \text{WITH } w_1(\mathbf{z}) = \sin \left( \frac{2\pi \mathbf{z}_1}{4} \right), w_2(\mathbf{z}) = 3e^{-\frac{1}{2} \left[ \frac{(\mathbf{z}_1 - 1)}{0.6} \right]^2}, \\
 w_3(\mathbf{z}) = 3\sigma \left( \frac{\mathbf{z}_1 - 1}{0.3} \right) \text{ AND } \sigma(x) = 1 / (1 + e^{-x}) . \\
 \hline
 \end{array}$$

Table 6: Potentials defining the target densities  $p(\mathbf{z}) = \frac{e^{-U(\mathbf{z})}}{Z}$ .

**Problem.** [31] showed that Variational Auto-Encoders can fit complex posterior distributions for the latent space using the inference model  $q_\phi(z|x)$ , parameterized as a fully factorized Gaussian and  $p(x)$  being a simple diagonal Gaussian. In table 6, we define complex non-Gaussian densities using a potential model  $U(\mathbf{Z})$ , as described in [39]. While modeling such distributions remains



within the reach of an adequately complex Variational Autoencoder, optimizing such a model remains challenging.

**Objective.** Similarly to [31], we choose  $p(x)$  to be an isotropic Gaussian and we model the target density using the top stochastic variable:  $p(z_L) = \frac{e^{U(z)}}{Z}$ . This results in the following bound:

$$\log Z \geq \mathbb{E}_{q_\phi(x, \mathbf{z})} \left[ U(z_L) + \log \frac{p_\theta(x|z_1)}{q_\phi(x)} + \sum_{i=1}^{L-1} \log \frac{p_\theta(z_i|z_{i+1})}{q_\phi(z_{i,TD}|z_{i+1}, x)q_\phi(z_{i+1}|z_{i,BU}, x)} \right]. \quad (11)$$

**Experimental Setup.** We test BIVA against the VAE and LVAE models using the same number of stochastic variables, hence the models use the same number of intermediate layers. All models are implemented using 5 stochastic layers, MLPs with one hidden layer of size 128 and with residual connections. The chosen architecture is voluntary kept minimal, therefore the task remains challenging for all models.

We train all models for  $1e^4$  iterations using the Adamax optimizer. We use batch sizes of size 512. The potential is linearly annealed from 0.1 to 1 during  $5e^3$  steps. In order to avoid posterior collapse, 0.5 *freebits* are applied to each stochastic layer. The learning rate is linearly increased from  $1e^{-5}$  to  $3e^{-3}$  and exponentially annealed back to  $1e^{-5}$ .

In order to measure the quality of the posterior density, we estimate  $KL(q(z_L)||p(z_L))$  using  $1e^6$  posterior samples evaluated using a grid of size  $(-2, 2)^2$  with a resolution of  $100 \times 100$ . Each model is trained 100 times for each density.

**Results.** According to the approximate  $KL(q(z_L)||p(z_L))$ , we found that BIVA tends to learn a posterior that lies closer to the target density. Figure 7 shows that BIVA often learns more complex features than the baseline models, which posteriors remain closer to the modes. Figure 7 reveals that LVAE is able to find solutions that are competitive with the best BIVA samples according to  $KL(q(z_L)||p(z_L))$ . However, this happens very rarely whereas BIVA has a more robust optimization behaviour.

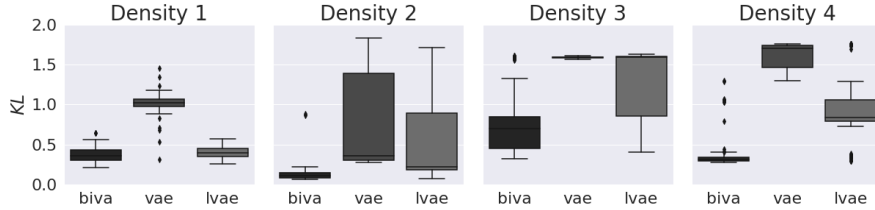

Figure 7: Distribution of the  $KL(q(z_L)||p(z_L))$  estimate for each model, each target density  $p(z_L)$  and for different initial random seeds. We collected 100 runs for each model and for each density. We found that BIVA behaves more consistently and often yield better approximations than the baseline models.

## E Initial Results on Text Generation Tasks

Optimizing generative models coupled with autoregressive models is a difficult task. Such coupling causes the posterior to collapse, and the latent variables are ignored. Nonetheless, autoregressive components remain a cornerstone of the generative models for text [2, 48, 49]. In order to enforce the model to use the latent variable, previous efforts aimed at weakening the decoder using powerful regularizing *tricks*, such as word dropout [2]. We investigate the use of BIVA in the context of sentence modeling without weakening the decoder. We show that it allows optimizing the latent variables more effectively, resulting in a higher measured KL when compared to the RNN-VAE [2] and the Hybrid VAE [48].

**Dataset.** We use the Bookcorpus dataset [60] of sentences of maximum 40 words, no preprocessing is performed and sentences are tokenized using the white spaces. We defined a vocabulary of 20000

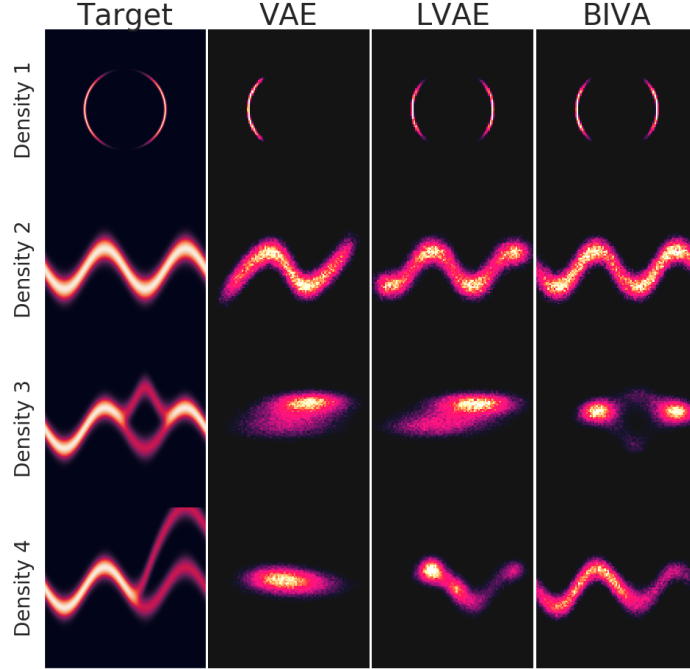

Figure 8: Target densities  $p(z_L)$  and the median posterior distributions  $q(z_L)$  for each model according to  $KL(q(z_L)||p(z_L))$  out of 100 runs for each model and for each density.

|                                                              | PARAMETERS | $-\log p(x)$ | KL    | PPL   |
|--------------------------------------------------------------|------------|--------------|-------|-------|
| <i>Results with autoregressive components, no dropout</i>    |            |              |       |       |
| LSTM                                                         | 15.0M      | = 41.49      | —     | 36.28 |
| RNN-VAE [2], $\mathcal{L}_1$ , WARMUP                        | 23.7M      | $\leq$ 42.09 | 1.61  | 38.21 |
| RNN-VAE [2], $\mathcal{L}_1$ , FINETUNED                     | 23.7M      | $\leq$ 42.41 | 5.13  | 39.26 |
| HYBRID VAE [48], $\mathcal{L}_1$ , FINETUNED                 | 23.7M      | $\leq$ 42.24 | 4.67  | 38.70 |
| <b>BIVA</b> L=7, $\mathcal{L}_1$ , FINETUNED                 | 23.0M      | $\leq$ 42.34 | 10.15 | 39.04 |
| <i>Results without autoregressive components, no dropout</i> |            |              |       |       |
| HYBRID VAE [48], $\mathcal{L}_1$ , FINETUNED                 | 15.0M      | $\leq$ 54.53 | 14.10 | 112.1 |
| <b>BIVA</b> L=7 FINETUNED, $\mathcal{L}_1$                   | 14.0M      | $\leq$ 54.13 | 15.33 | 108.3 |

Table 7: Test performances on the BookCorpus with 1 importance weighted sample (sentences limited to 40 words). The RNN-VAE and Hybrid VAE are trained and evaluated from our own implementation.

words and filtered out the sentences that contain non-indexed tokens. We randomly sampled 10000 sentences for testing and used the remaining 56M sentences for training.

**Models.** We couple BIVA with an LSTM decoder, using the output of the convolutional model as an input sequence for the auto-regressive model. We compare our model against a LSTM language model [17], the RNN-VAE [2], and the Hybrid VAE [48], which couples a convolutional architecture with an LSTM decoder. We also perform experiments without using autoregressive components.

All LSTM models are parameterized by 1024 units and we use embeddings of dimension 512. This results in an RNN-VAE model with 23.7M parameters and we limit the other models to use the same total number of parameters. This results in using a limited number of stochastic layers for the BIVA and small a small number of kernels of 128.

**Training.** We trained the models for 5 epochs with an initial learning rate of  $2e^{-3}$  using the Adamax optimizer. We used batches of size 512 and used only one stochastic sample. We train all latent variable models using the *freebits* method from [23] with an initial KL budget of 30 nats distributed equally over the stochastic variables and we incrementally decrease the *freebits* value *on plateau*. We also train the RNN-VAE baseline using the deterministic warmup method [2, 50] for comparison.

**Likelihood and latent variables usage.** We report the test set results in table 7 and test samples in 8 and reconstructions in table 9. While BIVA without the autoregressive decoder is not competitive with an LSTM language model, we observe that replacing the LSTM inference model by a BIVA model allows exploiting the latent space more actively, which results in a higher measured KL than the RNN-VAE and Hybrid VAE baselines.

| BIVA+LSTM                                                                                                                                                                                                                                                                                                                                                                                                                                                                                                                                                                                                                                                                                                                                                                                                                                                                                                                                                                                                                                                                                                                                                                                                                                                                                                                                                                                                                                                                                                                                                                                                                                                                                                                                                                                                                                                                                                                                                                                                                                                                                                                                                                                                                                              | RNN-VAE                                                                                                                                                                                                                                                                                                                                                                                                                                                                                                                                                                                                                                                                                                                                                                                                                                                                                                                                                                                                                                                                                                                                                                                                                                                                                                                                                                                                                                                                                                                                                                                                                                                                                                                                                                                                                                                                                                                                                                                                                                                                                                                                                                                                                                                                             |
|--------------------------------------------------------------------------------------------------------------------------------------------------------------------------------------------------------------------------------------------------------------------------------------------------------------------------------------------------------------------------------------------------------------------------------------------------------------------------------------------------------------------------------------------------------------------------------------------------------------------------------------------------------------------------------------------------------------------------------------------------------------------------------------------------------------------------------------------------------------------------------------------------------------------------------------------------------------------------------------------------------------------------------------------------------------------------------------------------------------------------------------------------------------------------------------------------------------------------------------------------------------------------------------------------------------------------------------------------------------------------------------------------------------------------------------------------------------------------------------------------------------------------------------------------------------------------------------------------------------------------------------------------------------------------------------------------------------------------------------------------------------------------------------------------------------------------------------------------------------------------------------------------------------------------------------------------------------------------------------------------------------------------------------------------------------------------------------------------------------------------------------------------------------------------------------------------------------------------------------------------------|-------------------------------------------------------------------------------------------------------------------------------------------------------------------------------------------------------------------------------------------------------------------------------------------------------------------------------------------------------------------------------------------------------------------------------------------------------------------------------------------------------------------------------------------------------------------------------------------------------------------------------------------------------------------------------------------------------------------------------------------------------------------------------------------------------------------------------------------------------------------------------------------------------------------------------------------------------------------------------------------------------------------------------------------------------------------------------------------------------------------------------------------------------------------------------------------------------------------------------------------------------------------------------------------------------------------------------------------------------------------------------------------------------------------------------------------------------------------------------------------------------------------------------------------------------------------------------------------------------------------------------------------------------------------------------------------------------------------------------------------------------------------------------------------------------------------------------------------------------------------------------------------------------------------------------------------------------------------------------------------------------------------------------------------------------------------------------------------------------------------------------------------------------------------------------------------------------------------------------------------------------------------------------------|
| <p>he said .<br/> i tried to think of something to say to him , but he was already on his way back to the house .<br/> it sounded as if he was going to say something .<br/> " and that 's why you 're coming . "<br/> " what ? "<br/> she swallowed .<br/> " i want you . "<br/> glancing up , i saw the way he was staring at me with a look of pure hatred .<br/> i need a favor . "<br/> he did n't .<br/> you 're not dead .<br/> i stood , and he followed .<br/> " can i sit on the couch and talk ? "<br/> " it was n't until i was fifteen , i was n't in the mood to be around .<br/> i looked down at my lap .<br/> the smile disappeared .<br/> it was hard to tell which one was more of a rock .<br/> i 'm not sure it 's a good idea .<br/> the first two .<br/> he was there .<br/> " all of you , " joe said .<br/> he did n't care if he was n't a vampire .<br/> her mouth curved up , then she nodded .<br/> just tell me what you want in the end .<br/> and again .<br/> the other man 's voice was hoarse and ragged .<br/> i had n't known that was a bad idea , but i had n't been able to get it out of my head .<br/> your brother is the most important thing to me .<br/> you dont need to go to the police , right ?<br/> there was a long silence .<br/> i looked up .<br/> he nodded , and he looked at me , and i could tell he was thinking about it .<br/> " hang on , baby .<br/> we had to be close to the city , and we could n't afford to be here .<br/> you know , it would be better if you were n't so stupid . "<br/> excuse me ?<br/> you know how much i love you , too .<br/> a woman 's voice , a voice that was familiar .<br/> i have a very important business to attend to , and i 'm going to have to make a decision .<br/> they sat on the small wooden table in the center of the room .<br/> " it 's fine . "<br/> she felt a rush of relief .<br/> maria , he says .<br/> what ?<br/> " it does n't seem like a lot to me , " he said .<br/> he 'd told her everything .<br/> " she 's in shock .<br/> " after all , " he murmured , " i 'm going to go get the rest of the stuff . "<br/> and then , finally , she 'd done it .<br/> her words were a whisper , but it was n't enough .</p> | <p>.<br/> " two .<br/> " you do n't have to do this . "<br/> the light from the lamp was dim , but the light was dim and the room was dark .<br/> or a nuclear bomb , or something .<br/> " the baby ? "<br/> " you 're not going to kill me . "<br/> she was n't going to .<br/> " i guess we could have been more careful , " he said .<br/> there are some things that are not good .<br/> " you 're a good man .<br/> i had n't been able to get it out .<br/> " you 're going to have to be careful , " he said .<br/> it 's not a bad idea .<br/> he asked .<br/> " this is a bad idea , " he said , his voice a little hoarse .<br/> " i 'm sure he 's in love with you .<br/> as he stepped out of the car , he saw the man standing in the doorway , his eyes wide and his face pale .<br/> .<br/> " no .<br/> " in the meantime , i need to get some sleep , " i said .<br/> i was n't .<br/> did i want to talk to you ?<br/> " i want to hear you say it . "<br/> the train was already in the driveway .<br/> " good .<br/> i just needed to get out of here , and i needed to get out of here .<br/> " this is a good idea .<br/> " hey . "<br/> she took a deep breath and let it out .<br/> then he kissed her .<br/> i felt a warm hand on my shoulder and a warm smile spread across my face .<br/> " he 's dead . "<br/> at the time , i was going to have to get out of the house .<br/> he was so close to the edge of the bed .<br/> " i do n't know .<br/> " i do n't have a choice . "<br/> i know i 'm not going to let him touch me , but i do .<br/> i could n't see the face of the man who 'd just been in the doorway .<br/> in the end , we all know that we are not going to be able to get out of this .<br/> " yes .<br/> " what are you doing here ? "<br/> so the only thing that mattered was that he was here .<br/> neither of them spoke .<br/> from now on , you will be able to get out of here .<br/> the thought of having to kill him made him want to kill her .<br/> the other two were staring at me , their eyes wide .<br/> i did n't want to be a part of it , but i was n't going to let it go .<br/> " i do n't want to talk about it .<br/> she looked at him , her eyes wide .<br/> " that 's what you 're going to do .</p> |

Table 8: Samples decoded from the prior of the BIVA with LSTM decoder and baseline RNN-VAE.

| input                                                                                                                                                                                                                                                                                                                                                                                                                                                                                                                                                                                                                                                                                                                                                                                                                                                                                                                                                                                                                                                                                                                                                                                                                                                                     | BIVA+LSTM                                                                                                                                                                                                                                                                                                                                                                                                                                                                                                                                                                                                                                                                                                                                                                                                                                                                                                                                                                                                                                                                      | RNN-VAE                                                                                                                                                                                                                                                                                                                                                                                                                                                                                                                                                                                                                                                                                                                                                                                                                                                                                                                                                                                                                                                                                          |
|---------------------------------------------------------------------------------------------------------------------------------------------------------------------------------------------------------------------------------------------------------------------------------------------------------------------------------------------------------------------------------------------------------------------------------------------------------------------------------------------------------------------------------------------------------------------------------------------------------------------------------------------------------------------------------------------------------------------------------------------------------------------------------------------------------------------------------------------------------------------------------------------------------------------------------------------------------------------------------------------------------------------------------------------------------------------------------------------------------------------------------------------------------------------------------------------------------------------------------------------------------------------------|--------------------------------------------------------------------------------------------------------------------------------------------------------------------------------------------------------------------------------------------------------------------------------------------------------------------------------------------------------------------------------------------------------------------------------------------------------------------------------------------------------------------------------------------------------------------------------------------------------------------------------------------------------------------------------------------------------------------------------------------------------------------------------------------------------------------------------------------------------------------------------------------------------------------------------------------------------------------------------------------------------------------------------------------------------------------------------|--------------------------------------------------------------------------------------------------------------------------------------------------------------------------------------------------------------------------------------------------------------------------------------------------------------------------------------------------------------------------------------------------------------------------------------------------------------------------------------------------------------------------------------------------------------------------------------------------------------------------------------------------------------------------------------------------------------------------------------------------------------------------------------------------------------------------------------------------------------------------------------------------------------------------------------------------------------------------------------------------------------------------------------------------------------------------------------------------|
| <p>" a sad song , being sung alone in the basement . "</p> <p>more often , though , wherever she sunk , beck was there , he looked just about as pale as i had ever seen him .</p> <p>caleb turned and shoved him back as he took his true form .</p> <p>i gasped , tried to pull away , squeezed my legs together .</p> <p>i agreed as i adjusted myself and sat heavily in my chair .</p> <p>beck was silent for a moment , then he spoke .</p> <p>they promise me things , ask me questions , whisper and plead .</p> <p>i glowed as i held the bear , almost bigger than me .</p> <p>i wonder how much he pays them to be his guard dogs .</p> <p>" humm , " richard muttered , and headed up the path .</p> <p>he was happy that he had found it in the CNK hall .</p> <p>it was an ancient , old , and very old .</p> <p>" i 'd prefer to go to the basement . "</p> <p>someday , i 'll share them with the rest of the world .</p> <p>" maybe i 'm not the right person for this one . "</p> <p>" gin is my sister , and she 's coming with me . "</p> <p>thick desire stormed her ... along with a bittersweet curl of emotion .</p> <p>they caused him to stagger back and drove him to the ground .</p> <p>you 're not much of a liar , i hear , the says .</p> | <p>" it sounds like you 've been through a lot . "</p> <p>he 's still a lot more than a friend .</p> <p>he lifted me up , his arms still wrapped around my waist .</p> <p>i gasped , and he was n't able to stop himself .</p> <p>he tried to ignore it , but my eyes were still closed .</p> <p>beck was silent for a moment , then he spoke .</p> <p>they might be able to do something about it , but they do n't .</p> <p>i started to close my eyes , but he was too strong .</p> <p>i had to admit that it was n't a good idea .</p> <p>" yes , " he said , his voice barely audible .</p> <p>he was n't going to be the one to go .</p> <p>it was an ancient , old , and very old .</p> <p>" i 'd prefer to go to the basement . "</p> <p>and now i have a lot of my own .</p> <p>" maybe we can get a little more of a ride . "</p> <p>there 's a chance i can get a little more sleep . "</p> <p>the tension was gone , and he was n't looking at me .</p> <p>they had to be at the top of the hill .</p> <p>you 're not supposed to be around here , are you ? "</p> | <p>" you 're going to be a great father . "</p> <p>in the end , we all knew what was going on .</p> <p>he was n't going to let her go .</p> <p>he was standing in the doorway , his hands folded in front of him .</p> <p>i felt my body tense , and i could n't help but smile .</p> <p>i did n't want to be the one to tell him .</p> <p>beck was silent for a moment , then he spoke .</p> <p>" we need to talk . " he said , his voice low .</p> <p>i could n't help but smile at the sight of her .</p> <p>i do n't want to be a part of this .</p> <p>" but you 're going to be a father . "</p> <p>he was n't sure if he was going to make it .</p> <p>it was an ancient , old , and very old .</p> <p>" i 'd prefer to go to the basement . "</p> <p>" we 're going to have to do something about it . "</p> <p>" i do n't think you 're going to be able to do that . "</p> <p>" if you want to , i 'll be there . "</p> <p>the air smelled of stale cigarette smoke .</p> <p>he 'd found a way to get her to safety .</p> <p>you 're not going to be able to do that , are you ? "</p> |

Table 9: Reconstruction of samples from the test set using the BIVA with LSTM decoder and the RNN-VAE baseline. The samples are decoded from the posterior distribution by using greedy decoding, without teacher forcing.

## F Semi-Supervised Learning

When defining BIVA for semi-supervised classification tasks we follow the approach described for the M2 model in [22]. In addition to BIVA, described in detail in Appendix B, we introduce a classification model  $q_\phi(y|x, z_{<L}^{\text{BU}})$  in the inference model, where  $y$  is the class variable, and a Categorical latent variable dependency in the generative model.

**Inference model.** For the classification model we introduce another deterministic hierarchy with an equivalent parameterization as  $\tilde{d}_{i,1}, \dots, \tilde{d}_{i,M}$ . We denote the hierarchy  $\tilde{d}_{i,1}^c, \dots, \tilde{d}_{i,M}^c$ . The forward-pass is performed by:

$$\tilde{d}_{i,0}^c = \begin{cases} x & i = 1 \\ \tilde{d}_{i-1,M}^c & \text{otherwise} \end{cases} \quad (12)$$

$$\tilde{d}_{i,j}^c = < g_{\phi_{i,j}}^c(\tilde{d}_{i,j-1}^c); z_i^{\text{BU}} > \text{ for } j = 1, \dots, M \quad (13)$$

$$y = g_{\phi_{i,M+1}}^c(\tilde{d}_{i,M}^c), \quad (14)$$

where  $g_{\phi_{i,M+1}}^c$  is a final densely connected neural network layer, of the same dimension as the number of categories, and a Softmax activation function. The inference model is thereby factorized by:

$$q_\phi(\mathbf{z}, y|x) = q_\phi(z_L|x, y, z_{<L}^{\text{BU}}) q_\phi(y|x, z_{<L}^{\text{BU}}) \prod_{i=1}^{L-1} q_\phi(z_i^{\text{BU}}|x, z_{<i}^{\text{BU}}) q_{\phi,\theta}(z_i^{\text{TD}}|x, y, z_{<i}^{\text{BU}}, z_{>i}^{\text{BU}}, z_{>i}^{\text{TD}}). \quad (15)$$

**Generative model.** For each stochastic latent variable,  $\mathbf{z}$ , and the observed variable  $x$  in the generative model, as well as the TD path of the inference model, we add a conditional dependency on a categorical variable  $y$ :

$$p_\theta(x, y, \mathbf{z}) = p_\theta(x|\mathbf{z}, y) p_\theta(z_L) p_\theta(y) \prod_{i=1}^{L-1} p_\theta(z_i|z_{>i}, y). \quad (16)$$

**Evidence lower bound.** In a semi-supervised learning problem, we have labeled data and unlabeled data which results in two formulations of the ELBO. The ELBO for labeled data points is given by:

$$\log p_\theta(x, y) \geq \mathbb{E}_{q_\phi(\mathbf{z}|x, y)} \left[ \log \frac{p_\theta(x, y, \mathbf{z})}{q_{\phi,\theta}(\mathbf{z}|x, y)} \right] \equiv -\mathcal{F}(\theta, \phi). \quad (17)$$

Since the classification model is not included in the above definition of the ELBO we add a classification loss term (a categorical cross-entropy), equivalent to the approach in [22]:

$$\bar{\mathcal{F}}(\theta, \phi) = \bar{\mathcal{F}}(\theta, \phi) - \alpha \cdot \mathbb{E}_{q(z_{<L}|x)} [\log q_\phi(y|x, z_{<L}^{\text{BU}})], \quad (18)$$

where  $\alpha$  is a hyperparameter that we define as in [31]. For the unlabeled data points, we marginalize over the labels:

$$\log p_\theta(x) \geq \mathbb{E}_{q_\phi(\mathbf{z}, y|x)} \left[ \log \frac{p_\theta(x, y, \mathbf{z})}{q_{\phi,\theta}(\mathbf{z}, y|x)} \right] \equiv -\mathcal{U}(\theta, \phi). \quad (19)$$

The combined objective function over the labeled,  $(x_l, y_l)$ , and unlabeled data points,  $(x_u)$ , are thereby given by:

$$\mathcal{J}(\theta, \phi) = \sum_{x_l, y_l} \bar{\mathcal{F}}(\theta, \phi; x_l, y_l) + \sum_{x_u} \mathcal{U}(\theta, \phi; x_u). \quad (20)$$

## G Additional Results

Table 10: Test log-likelihood on dynamically binarized MNIST for different number of importance weighted samples. The finetuned models are trained for an additional number of epochs with no *free bits*,  $\lambda = 0$ .

|                                                  | $-\log p(x)$ |
|--------------------------------------------------|--------------|
| <i>Results with autoregressive components</i>    |              |
| DRAW+VGP [53]                                    | $< 79.88$    |
| IAFVAE [23]                                      | $\leq 79.10$ |
| VLAE [5]                                         | $\leq 78.53$ |
| <i>Results without autoregressive components</i> |              |
| IWAE [4]                                         | $\leq 82.90$ |
| CONVVAE+HVI [47]                                 | $\leq 81.94$ |
| LVAE [50]                                        | $\leq 81.74$ |
| DISCRETE VAE [42]                                | $\leq 80.04$ |
| <b>BIVA</b> , $\mathcal{L}_1$                    | $\leq 80.60$ |
| <b>BIVA</b> , $\mathcal{L}_{1e3}$                | $\leq 78.49$ |
| <b>BIVA</b> FINETUNED, $\mathcal{L}_1$           | $\leq 80.06$ |
| <b>BIVA</b> FINETUNED, $\mathcal{L}_{1e3}$       | $\leq 78.41$ |

Table 11: Test log-likelihood on dynamically binarized OMNIGLOT for different number of importance weighted samples. The finetuned models are trained for an additional number of epochs with no *free bits*,  $\lambda = 0$ .

|                                                  | $-\log p(x)$  |
|--------------------------------------------------|---------------|
| <i>Results with autoregressive components</i>    |               |
| DRAW [13]                                        | $< 96.50$     |
| CONVDRAW [12]                                    | $< 91.00$     |
| VLAE [5]                                         | $\leq 89.83$  |
| <i>Results without autoregressive components</i> |               |
| IWAE [4]                                         | $\leq 103.38$ |
| LVAE [50]                                        | $\leq 102.11$ |
| DVAE [42]                                        | $\leq 97.43$  |
| <b>BIVA</b> , $\mathcal{L}_1$                    | $\leq 95.90$  |
| <b>BIVA</b> FINETUNED, $\mathcal{L}_1$           | $\leq 93.54$  |
| <b>BIVA</b> FINETUNED, $\mathcal{L}_{1e3}$       | $\leq 91.34$  |

Table 12: Test log-likelihood on statically binarized Fashion MNIST for different number of importance weighted samples. The finetuned models are trained for an additional number of epochs with no *free bits*,  $\lambda = 0$ .

|                                            | $-\log p(x)$ |
|--------------------------------------------|--------------|
| <b>BIVA</b> , $\mathcal{L}_1$              | $\leq 94.05$ |
| <b>BIVA</b> FINETUNED, $\mathcal{L}_1$     | $\leq 93.54$ |
| <b>BIVA</b> FINETUNED, $\mathcal{L}_{1e3}$ | $\leq 87.98$ |

Table 13: Test log-likelihood on ImageNet 32x32 for different number of importance weighted samples.

|                                             | BITS/DIM    |
|---------------------------------------------|-------------|
| <i>With autoregressive components</i>       |             |
| CONVDRAW [12]                               | < 4.10      |
| PIXELRNN [57]                               | = 3.63      |
| GATEDPIXELCNN [56]                          | = 3.57      |
| <i>Without autoregressive components</i>    |             |
| REALNVP [9]                                 | = 4.28      |
| GLOW [21]                                   | = 4.09      |
| FLOW++ [16]                                 | = 3.86      |
| <b>BIVA, <math>\mathcal{L}_1</math></b>     | $\leq 3.98$ |
| <b>BIVA, <math>\mathcal{L}_{1e3}</math></b> | $\leq 3.96$ |

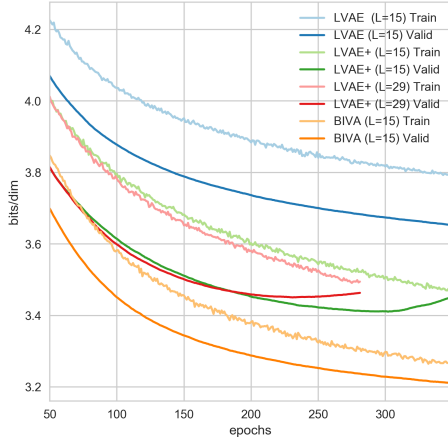

(a)  $\mathcal{L}_1$  (bits/dim).

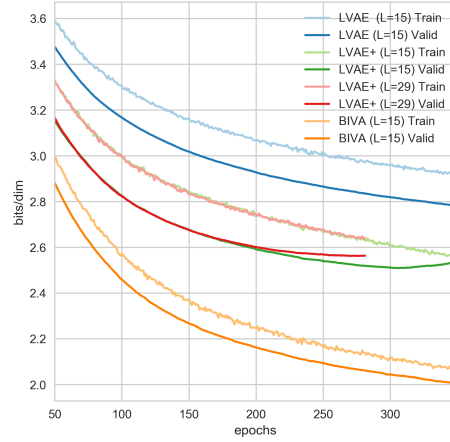

(b)  $\log p_\theta(x|\mathbf{z})$  (bits/dim).

Figure 9: Convergence plot on CIFAR-10 training for the LVAE with  $L = 15$ , the LVAE+ with  $L = 15$ , the LVAE+ with  $L = 29$ , and BIVA with  $L = 15$ . (a) shows the convergence of the 1 importance weighted ELBO,  $\mathcal{L}_1$ , calculated in bits/dim. (b) shows the convergence of the *reconstruction loss*. The discrepancy between (a) and (b) is explained by the added cost from the stochastic latent variables, the Kullback-Leibler divergence  $KL[p(\mathbf{z})||q(\mathbf{z}|x)]$ .

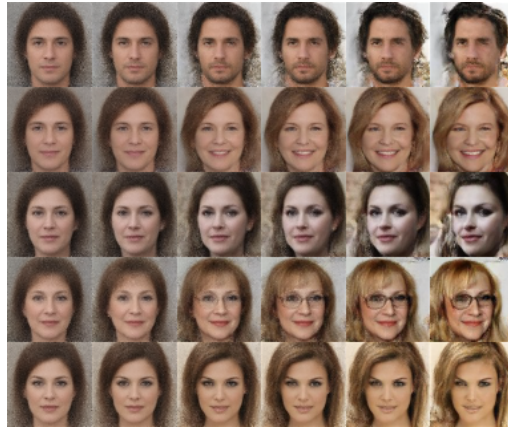

Figure 10: 64x64 CelebA samples generated from a BIVA with increasing levels of stochasticity in the model (going from close to the mode to the full distribution). In each column the latent variances are scaled with factors 0.1, 0.3, 0.5, 0.7, 0.9, 1.0. Images in a row look similar because they use the same Gaussian random noise  $\epsilon$  to generate the latent variables. BIVA has  $L = 20$  stochastic latent layers connected by three layer ResNet blocks.



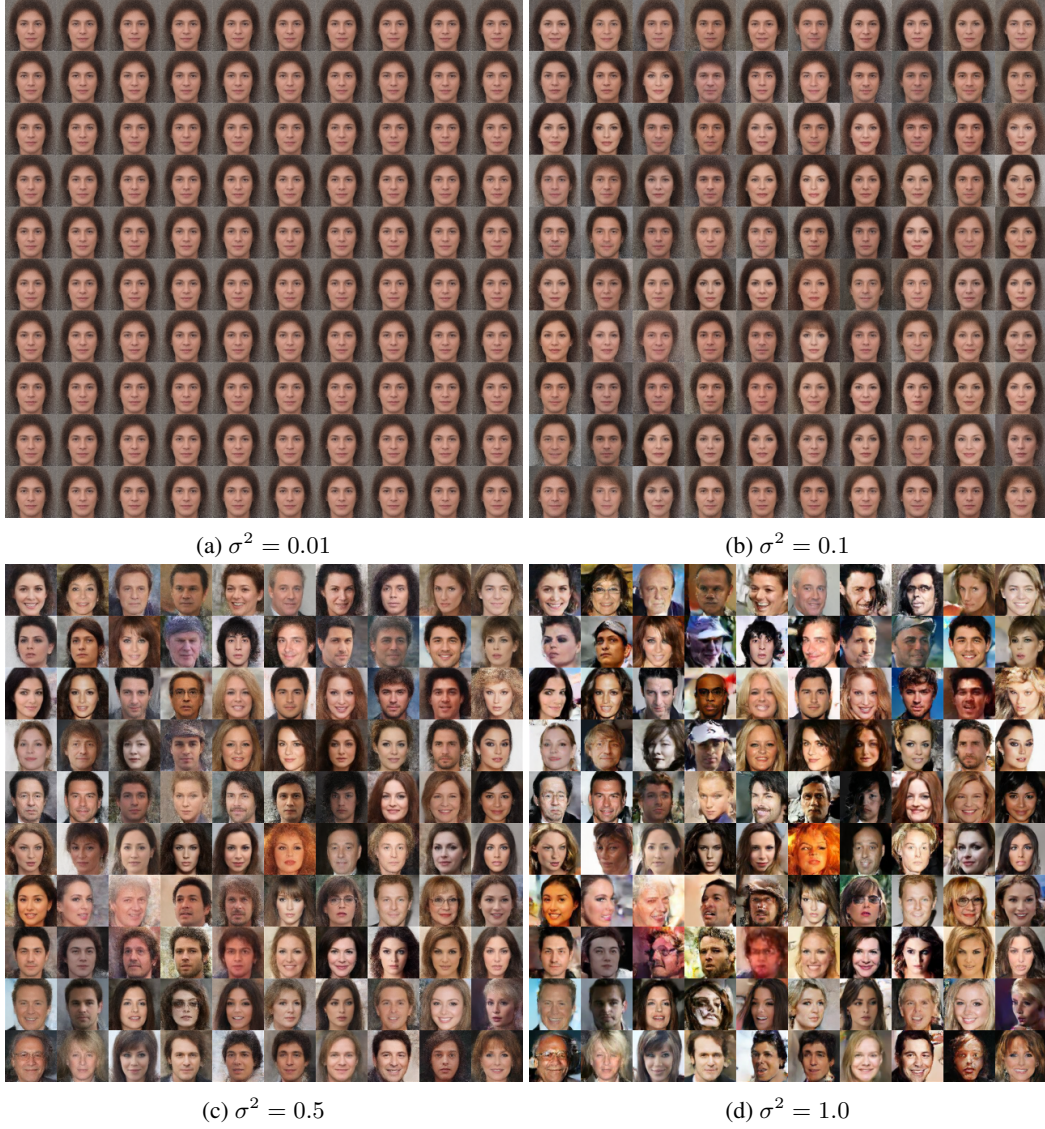

Figure 11: BIVA  $\mathcal{N}(0, \sigma^2)$  generations with varying  $\sigma^2 = 0.01, 0.1, 0.5, 1.0$  for (a), (b), (c) and (d) respectively. We follow the same generating procedure of Figure 10. BIVA has  $L = 20$  stochastic latent variables and is trained on the CelebA dataset, preprocessed to 64x64 images following [27]. BIVA achieves a  $\mathcal{L}_1 = 2.48$  bits/dim on the test set. Close to the mode of the latent distribution there is very little variance in generated natural images. When we *loosen* the samples towards the full distribution,  $\sigma^2 = 1$ , we can see how the generated images are adopting different styles and contexts.

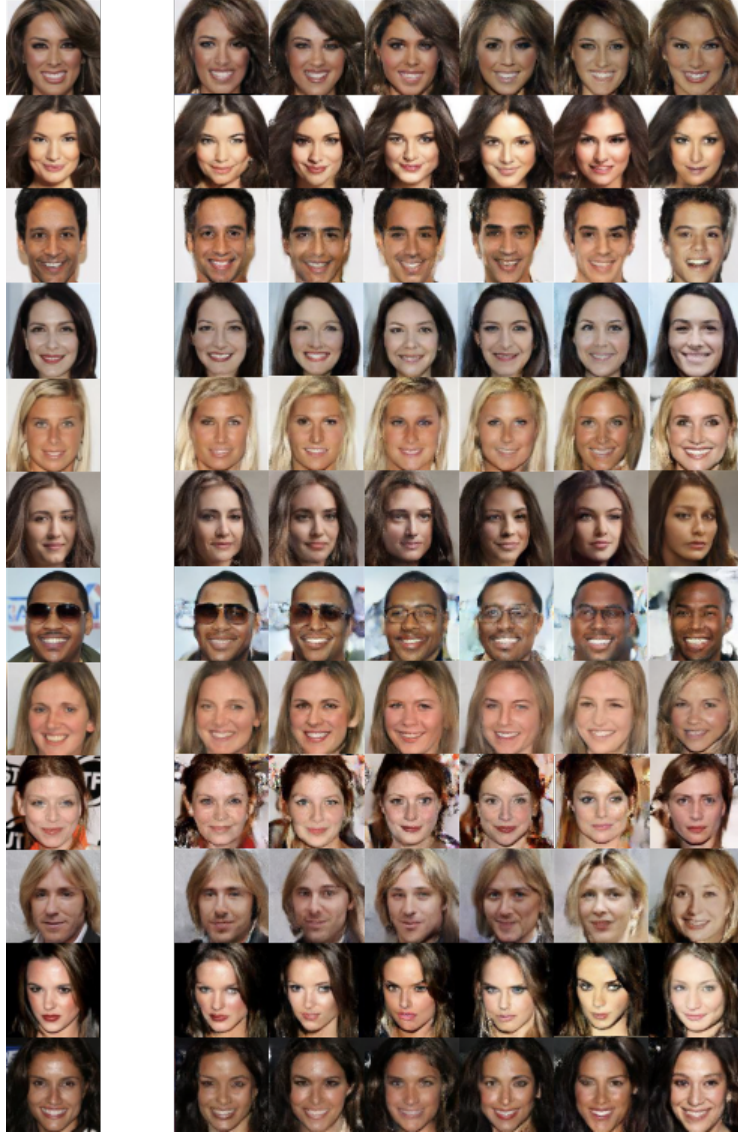

Figure 12: BIVA  $L = 20$  generations (right) from fixed  $z_{>i}$  given an input image (left), for different layers throughout the stochastic variable hierarchy (from left to right  $i = 12, 14, 16, 17, 18, 19$ ). The model is trained on CelebA, preprocessed to 64x64 images following [27].  $z_{>i}$  are fixed by passing the original image through the encoder, after which  $z_{\leq i}$  are sampled from the prior. When generating from a higher  $z_i$  (columns) it is shown how the model has more *freedom* to augment the input images. BIVA achieves a  $\mathcal{L}_1 = 2.48$  bits/dim on the test set.



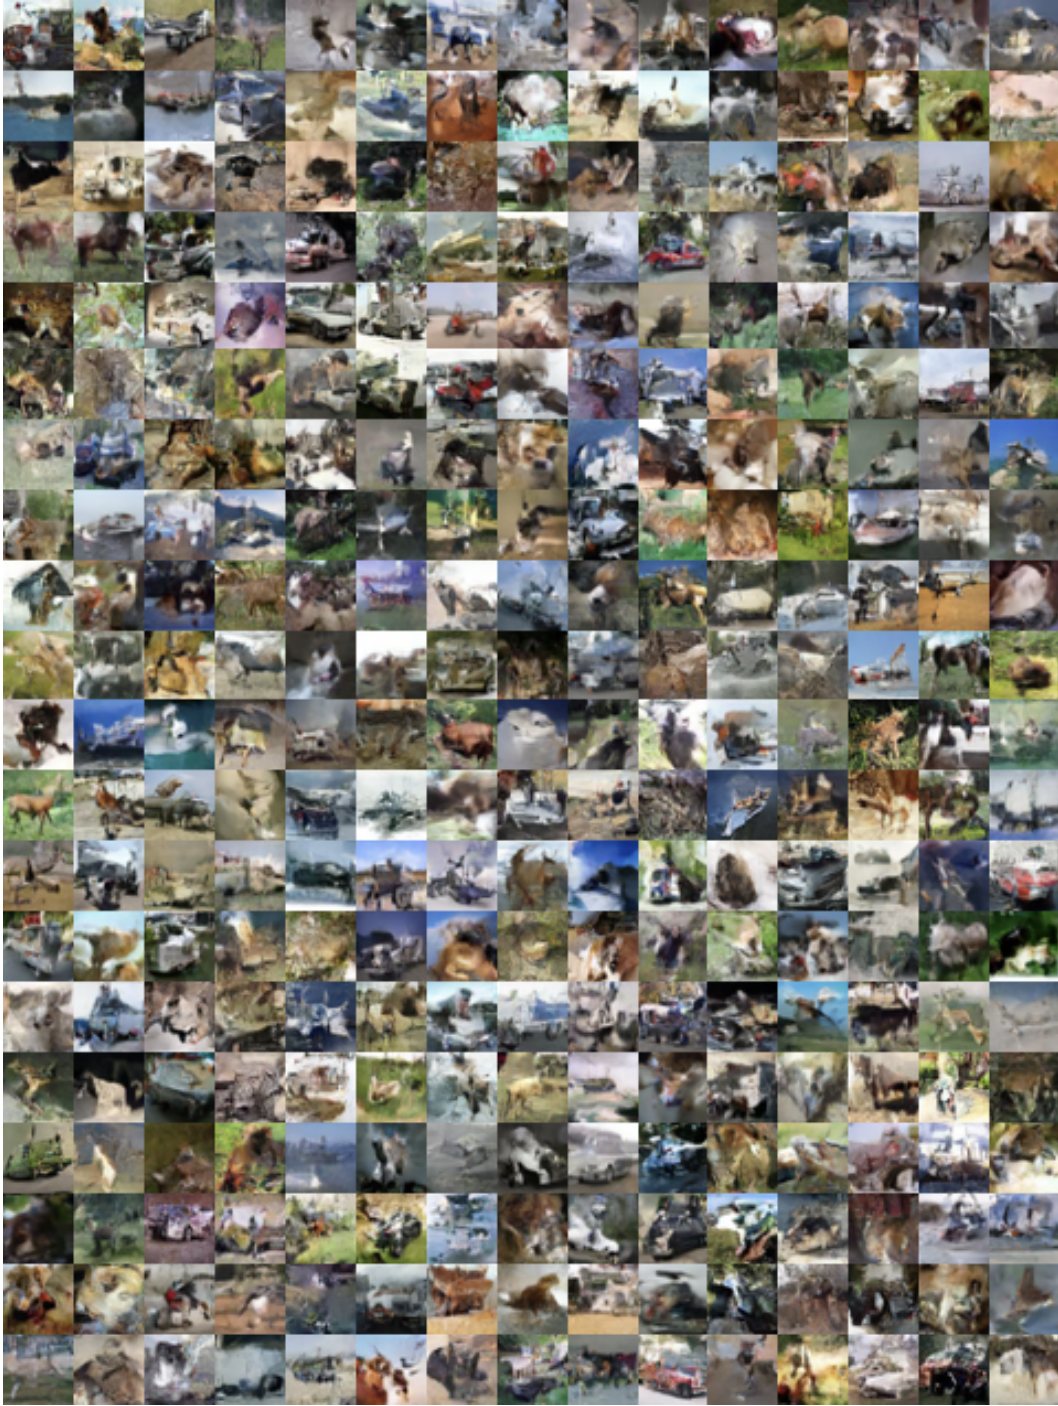

Figure 13: BIVA  $\mathcal{N}(0, I)$  generations on a model trained on CIFAR-10. BIVA has  $L = 15$  stochastic latent variables and achieves a 3.08 bits/dim on the test set. The images are still not as sharp and coherent as the PixelCNN++ [45] (3.08 vs. 2.92), however, it does achieve to find coherent structure resembling the categories of the CIFAR-10 dataset.

## References

- [1] Y. Bengio, A. Courville, and P. Vincent. Representation learning: A review and new perspectives. *IEEE Transactions on Pattern Analysis and Machine Intelligence*, 35(8), 2013.
- [2] S. Bowman, L. Vilnis, O. Vinyals, A. Dai, R. Jozefowicz, and S. Bengio. Generating sentences from a continuous space. *arXiv preprint arXiv:1511.06349*, 2015.
- [3] Y. Burda, R. Grosse, and R. Salakhutdinov. Accurate and conservative estimates of mrf log-likelihood using reverse annealing. In *Proceedings of the International Conference on Artificial Intelligence and Statistics*, 2015.
- [4] Y. Burda, R. Grosse, and R. Salakhutdinov. Importance Weighted Autoencoders. *arXiv preprint arXiv:1509.00519*, 2015.
- [5] X. Chen, D. P. Kingma, T. Salimans, Y. Duan, P. Dhariwal, J. Schulman, I. Sutskever, and P. Abbeel. Variational Lossy Autoencoder. In *International Conference on Learning Representations*, 2017.
- [6] Z. Dai, Z. Yang, F. Yang, W. W. Cohen, and R. Salakhutdinov. Good semi-supervised learning that requires a bad GAN. In *Advances in Neural Information Processing Systems*, 2017.
- [7] A. B. Dieng, Y. Kim, A. M. Rush, and D. M. Blei. Avoiding latent variable collapse with generative skip models. *arXiv preprint arXiv:1807.04863*, 2018.
- [8] L. Dinh, D. Krueger, and Y. Bengio. Nice: Non-linear independent components estimation. *arXiv preprint arXiv:1410.8516*, 2014.
- [9] L. Dinh, J. Sohl-Dickstein, and S. Bengio. Density estimation using real nvp. *arXiv preprint arXiv:1605.08803*, 2016.
- [10] A. Dosovitskiy and T. Brox. Generating images with perceptual similarity metrics based on deep networks. In *Advances in Neural Information Processing Systems*, 2016.
- [11] I. Goodfellow, J. Pouget-Abadie, M. Mirza, B. Xu, D. Warde-Farley, S. Ozair, A. Courville, and Y. Bengio. Generative adversarial nets. In *Advances in Neural Information Processing Systems*. 2014.
- [12] K. Gregor, R. D. J. Besse, Fredric, I. Danihelka, and D. Wierstra. Towards conceptual compression. *arXiv preprint arXiv:1604.08772*, 2016.
- [13] K. Gregor, I. Danihelka, A. Graves, and D. Wierstra. Draw: A recurrent neural network for image generation. *arXiv preprint arXiv:1502.04623*, 2015.
- [14] I. Gulrajani, K. Kumar, F. Ahmed, A. Ali Taiga, F. Visin, D. Vazquez, and A. Courville. PixelVAE: A latent variable model for natural images. *arXiv e-prints*, 1611.05013, Nov. 2016.
- [15] K. He, X. Zhang, S. Ren, and J. Sun. Deep residual learning for image recognition. *arXiv preprint arXiv:1512.03385*, 2015.
- [16] J. Ho, X. Chen, A. Srinivas, Y. Duan, and P. Abbeel. Flow++: Improving flow-based generative models with variational dequantization and architecture design. *arXiv preprint arXiv:1902.00275*, 2019.
- [17] S. Hochreiter and J. Schmidhuber. Long short-term memory. *Neural computation*, 9(8):1735–1780, 1997.
- [18] M. D. Hoffman, D. M. Blei, C. Wang, and J. Paisley. Stochastic variational inference. *Journal of Machine Learning Research*, 2013.
- [19] M. I. Jordan, Z. Ghahramani, T. S. Jaakkola, and L. K. Saul. An introduction to variational methods for graphical models. *Machine Learning*, 37(2):183–233, Nov. 1999.
- [20] D. Kingma and J. Ba. Adam: A Method for Stochastic Optimization. *arXiv preprint arXiv:1412.6980*, 12 2014.
- [21] D. P. Kingma and P. Dhariwal. Glow: Generative flow with invertible 1x1 convolutions. In *Advances in Neural Information Processing Systems*, 2018.
- [22] D. P. Kingma, D. J. Rezende, S. Mohamed, and M. Welling. Semi-Supervised Learning with Deep Generative Models. In *Proceedings of the International Conference on Machine Learning*, 2014.
- [23] D. P. Kingma, T. Salimans, R. Jozefowicz, X. Chen, I. Sutskever, and M. Welling. Improved variational inference with inverse autoregressive flow. In *Advances in Neural Information Processing Systems*. 2016.

- [24] M. Kingma, Diederik P; Welling. Auto-Encoding Variational Bayes. *arXiv preprint arXiv:1312.6114*, 12 2013.
- [25] B. M. Lake, R. R. Salakhutdinov, and J. Tenenbaum. One-shot learning by inverting a compositional causal process. In *Advances in Neural Information Processing Systems*. 2013.
- [26] H. Larochelle and I. Murray. The neural autoregressive distribution estimator. In *Proceedings of the International Conference on Artificial Intelligence and Statistics*, 2011.
- [27] A. B. L. Larsen, S. K. Sønderby, H. Larochelle, and O. Winther. Autoencoding beyond pixels using a learned similarity metric. In *Proceedings of the International Conference on Machine Learning*, 2016.
- [28] Y. LeCun, L. Bottou, Y. Bengio, and P. Haffner. Gradient-based learning applied to document recognition. In *Proceedings of the IEEE Computer Society Conference on Computer Vision and Pattern Recognition*, pages 2278–2324, 1998.
- [29] C. Li, K. Xu, J. Zhu, and B. Zhang. Triple generative adversarial nets. *arXiv preprint arXiv:1703.02291*, 2017.
- [30] L. Maaløe, M. Fraccaro, and O. Winther. Semi-supervised generation with cluster-aware generative models. *arXiv preprint arXiv:1704.00637*, 2017.
- [31] L. Maaløe, C. K. Sønderby, S. K. Sønderby, and O. Winther. Auxiliary Deep Generative Models. In *Proceedings of the International Conference on Machine Learning*, 2016.
- [32] T. Miyato, S.-i. Maeda, M. Koyama, K. Nakae, and S. Ishii. Distributional Smoothing with Virtual Adversarial Training. *arXiv preprint arXiv:1507.00677*, 7 2015.
- [33] A. Mnih and K. Gregor. Neural variational inference and learning in belief networks. In *Proceedings of the International Conference on Machine Learning*, pages 1791–1799, 2014.
- [34] E. Nalisnick, A. Matsukawa, Y. W. Teh, D. Gorur, and B. Lakshminarayanan. Do deep generative models know what they don’t know? *arXiv preprint arXiv:1810.09136*, 2018.
- [35] Y. Netzer, T. Wang, A. Coates, A. Bissacco, B. Wu, and A. Y. Ng. Reading digits in natural images with unsupervised feature learning. In *Deep Learning and Unsupervised Feature Learning, workshop at Neural Information Processing Systems 2011*, 2011.
- [36] J. Paisley, D. M. Blei, and M. I. Jordan. Variational bayesian inference with stochastic search. In *Proceedings of the International Conference on Machine Learning*, pages 1363–1370, 2012.
- [37] R. Ranganath, D. Tran, and D. M. Blei. Hierarchical variational models. In *Proceedings of the International Conference on Machine Learning*, 2016.
- [38] A. Rasmus, M. Berglund, M. Honkala, H. Valpola, and T. Raiko. Semi-supervised learning with ladder networks. In *Advances in Neural Information Processing Systems*, 2015.
- [39] D. J. Rezende and S. Mohamed. Variational Inference with Normalizing Flows. In *Proceedings of the International Conference on Machine Learning*, 2015.
- [40] D. J. Rezende, S. Mohamed, and D. Wierstra. Stochastic Backpropagation and Approximate Inference in Deep Generative Models. *arXiv preprint arXiv:1401.4082*, 04 2014.
- [41] D. J. Rezende and F. Viola. Taming vaes. *arXiv preprint arXiv:1810.00597*, 2018.
- [42] J. T. Rolfe. Discrete variational autoencoders. In *Proceedings of the International Conference on Learning Representations*, 2017.
- [43] R. Salakhutdinov and I. Murray. On the quantitative analysis of deep belief networks. In *Proceedings of the International Conference on Machine Learning*, 2008.
- [44] T. Salimans, I. Goodfellow, W. Zaremba, V. Cheung, A. Radford, and X. Chen. Improved techniques for training gans. *arXiv preprint arXiv:1606.03498*, 2016.
- [45] T. Salimans, A. Karparthy, X. Chen, and D. P. Kingma. Pixelcnn++: Improving the pixelcnn with discretized logistic mixture likelihood and other modifications. *arXiv preprint:1701.05517*, 2017, 2017.
- [46] T. Salimans and D. P. Kingma. Weight normalization: A simple reparameterization to accelerate training of deep neural networks. In *Proceedings of the International Conference on Neural Information Processing Systems*, 2016.

- [47] T. Salimans, D. P. Kingma, and M. Welling. Markov chain monte carlo and variational inference: Bridging the gap. In *Proceedings of the International Conference on Machine Learning*, 2015.
- [48] S. Semeniuta, A. Severyn, and E. Barth. A hybrid convolutional variational autoencoder for text generation. *arXiv preprint arXiv:1702.02390*, 2017.
- [49] H. Shah, B. Zheng, and D. Barber. Generating sentences using a dynamic canvas, 2018.
- [50] C. K. Sønderby, T. Raiko, L. Maaløe, S. K. Sønderby, and O. Winther. Ladder variational autoencoders. In *Advances in Neural Information Processing Systems* 29. 2016.
- [51] J. Springenberg. Unsupervised and semi-supervised learning with categorical generative adversarial networks. *arXiv preprint arXiv:1511.06390*, 2015.
- [52] J. M. Tomczak and M. Welling. Improving variational auto-encoders using householder flow. *arXiv preprint arXiv:1611.09630*, 2016.
- [53] D. Tran, R. Ranganath, and D. M. Blei. Variational Gaussian process. In *Proceedings of the International Conference on Learning Representations*, 2016.
- [54] A. Vahdat, W. G. Macready, Z. Bian, A. Khoshman, and E. Andriyash. DVAE++: discrete variational autoencoders with overlapping transformations. In *Proceedings of the International Conference on Machine Learning*, 2018.
- [55] A. van den Oord, S. Dieleman, H. Zen, K. Simonyan, O. Vinyals, A. Graves, N. Kalchbrenner, A. Senior, and K. Kavukcuoglu. Wavenet: A generative model for raw audio. *arXiv preprint arXiv:1609.03499*, 2016.
- [56] A. van den Oord, N. Kalchbrenner, O. Vinyals, L. Espeholt, A. Graves, and K. Kavukcuoglu. Conditional image generation with pixelcnn decoders. *arXiv preprint arXiv:1606.05328*, 2016.
- [57] A. van den Oord, K. Nal, and K. Kavukcuoglu. Pixel recurrent neural networks. *arXiv preprint arXiv:1601.06759*, 01 2016.
- [58] A. van den Oord and B. Schrauwen. Factoring variations in natural images with deep gaussian mixture models. In *Advances in Neural Information Processing Systems*, 2014.
- [59] S. Zhao, J. Song, and S. Ermon. Towards deeper understanding of variational autoencoding models. *arXiv preprint arXiv:1702.08658*, 2017.
- [60] Y. Zhu, R. Kiros, R. Zemel, R. Salakhutdinov, R. Urtasun, A. Torralba, and S. Fidler. Aligning books and movies: Towards story-like visual explanations by watching movies and reading books. In *Proceedings of the IEEE international conference on computer vision*, pages 19–27, 2015.
